# Supplementary material for: Early pain in females is linked to late pathological features in murine experimental osteoarthritis
Source: PeerJ. 2023 Jun 22;11:e15482. doi: 10.7717/peerj.15482 (PMC10290834; doi:10.7717/peerj.15482)
Supplement: Table S1 — Heatmap based on the Pearson coefficient values (r) between OA histological parameters and the different AUC pain parameters during the (A) whole time course, (B) early phase and (C) late phase. Coefficient values are displayed for significant correlations followed by the level of significance (*). Pearson coefficient values range from +1 and −1, with +1 as a perfect positive correlation, 0 as no correlation and −1 as a perfect negative correlation. * p < 0.05 and ** p < 0.01. d. Cannot be computed because at least one of the variables is constant. [file peerj-11-15482-s002.pdf]

A)

## Female

## Male

|                     | Cartilage damage    | Dislocation         | Osteophyte number | Synovial thickness | Synovial cellularity | Total Time course         | Cartilage damage  | Dislocation | Osteophyte number | Synovial thickness | Synovial cellularity |                     |
|---------------------|---------------------|---------------------|-------------------|--------------------|----------------------|---------------------------|-------------------|-------------|-------------------|--------------------|----------------------|---------------------|
| Pearson Correlation | ,922 <sup>***</sup> | ,700 <sup>*</sup>   | 0,306             | 0,149              | 0,453                | Incapacitance             | 0,376             | 0,356       | 0,485             | 0,114              | 0,504                | Pearson Correlation |
| Sig. (2-tailed)     | 0,000               | 0,024               | 0,390             | 0,681              | 0,189                |                           | 0,285             | 0,313       | 0,155             | 0,754              | 0,137                | Sig. (2-tailed)     |
| N                   | 10                  | 10                  | 10                | 10                 | 10                   |                           | 10                | 10          | 10                | 10                 | 10                   | N                   |
| Pearson Correlation | ,702 <sup>*</sup>   | ,934 <sup>***</sup> | 0,543             | 0,551              | 0,255                | PAM                       | 0,015             | -0,249      | 0,225             | 0,001              | 0,256                | Pearson Correlation |
| Sig. (2-tailed)     | 0,024               | 0,000               | 0,104             | 0,099              | 0,478                |                           | 0,967             | 0,488       | 0,533             | 0,998              | 0,474                | Sig. (2-tailed)     |
| N                   | 10                  | 10                  | 10                | 10                 | 10                   |                           | 10                | 10          | 10                | 10                 | 10                   | N                   |
| Pearson Correlation | 0,612               | 0,078               | 0,334             | 0,383              | -0,120               | Max Contact Max Intensity | ,748 <sup>*</sup> | 0,631       | ,645 <sup>*</sup> | 0,502              | 0,588                | Pearson Correlation |
| Sig. (2-tailed)     | 0,060               | 0,830               | 0,346             | 0,275              | 0,741                |                           | 0,013             | 0,051       | 0,044             | 0,139              | 0,074                | Sig. (2-tailed)     |
| N                   | 10                  | 10                  | 10                | 10                 | 10                   |                           | 10                | 10          | 10                | 10                 | 10                   | N                   |
| Pearson Correlation | ,662 <sup>*</sup>   | ,774 <sup>***</sup> | 0,579             | 0,391              | 0,482                | Print Area                | 0,376             | 0,417       | 0,553             | 0,528              | 0,328                | Pearson Correlation |
| Sig. (2-tailed)     | 0,037               | 0,009               | 0,079             | 0,264              | 0,158                |                           | 0,284             | 0,231       | 0,097             | 0,117              | 0,355                | Sig. (2-tailed)     |
| N                   | 10                  | 10                  | 10                | 10                 | 10                   |                           | 10                | 10          | 10                | 10                 | 10                   | N                   |
| Pearson Correlation | ,906 <sup>***</sup> | 0,582               | ,665 <sup>*</sup> | 0,553              | 0,378                | Duty Cycle                | 0,194             | 0,270       | 0,151             | 0,271              | 0,375                | Pearson Correlation |
| Sig. (2-tailed)     | 0,000               | 0,078               | 0,036             | 0,097              | 0,282                |                           | 0,590             | 0,451       | 0,678             | 0,449              | 0,285                | Sig. (2-tailed)     |
| N                   | 10                  | 10                  | 10                | 10                 | 10                   |                           | 10                | 10          | 10                | 10                 | 10                   | N                   |
| Pearson Correlation | ,794 <sup>***</sup> | 0,433               | ,680 <sup>*</sup> | 0,531              | 0,434                | Stand time                | -0,035            | -0,071      | -0,085            | -0,048             | 0,055                | Pearson Correlation |
| Sig. (2-tailed)     | 0,006               | 0,211               | 0,030             | 0,115              | 0,210                |                           | 0,923             | 0,846       | 0,815             | 0,896              | 0,880                | Sig. (2-tailed)     |
| N                   | 10                  | 10                  | 10                | 10                 | 10                   |                           | 10                | 10          | 10                | 10                 | 10                   | N                   |
| Pearson Correlation | ,798 <sup>***</sup> | ,781 <sup>***</sup> | ,642 <sup>*</sup> | 0,474              | 0,463                | Swing time                | 0,545             | 0,555       | 0,475             | ,676*              | 0,604                | Pearson Correlation |
| Sig. (2-tailed)     | 0,006               | 0,008               | 0,045             | 0,166              | 0,177                |                           | 0,103             | 0,096       | 0,166             | 0,032              | 0,065                | Sig. (2-tailed)     |
| N                   | 10                  | 10                  | 10                | 10                 | 10                   |                           | 10                | 10          | 10                | 10                 | 10                   | N                   |
| Pearson Correlation | 0,099               | -0,155              | 0,341             | 0,164              | 0,303                | Single Stance             | -0,044            | -0,111      | 0,466             | 0,533              | 0,182                | Pearson Correlation |
| Sig. (2-tailed)     | 0,786               | 0,668               | 0,335             | 0,650              | 0,395                |                           | 0,904             | 0,761       | 0,174             | 0,113              | 0,615                | Sig. (2-tailed)     |
| N                   | 10                  | 10                  | 10                | 10                 | 10                   |                           | 10                | 10          | 10                | 10                 | 10                   | N                   |
| Pearson Correlation | ,815 <sup>***</sup> | ,934 <sup>***</sup> | ,658 <sup>*</sup> | ,710*              | 0,372                | Initial Dual Stance       | 0,393             | 0,358       | 0,238             | 0,422              | 0,502                | Pearson Correlation |
| Sig. (2-tailed)     | 0,004               | 0,000               | 0,038             | 0,021              | 0,290                |                           | 0,261             | 0,310       | 0,508             | 0,225              | 0,139                | Sig. (2-tailed)     |
| N                   | 10                  | 10                  | 10                | 10                 | 10                   |                           | 10                | 10          | 10                | 10                 | 10                   | N                   |
| Pearson Correlation | -0,302              | -0,373              | -0,128            | -0,281             | -0,548               | Terminal Dual Stance      | 0,299             | 0,253       | 0,376             | 0,260              | 0,191                | Pearson Correlation |
| Sig. (2-tailed)     | 0,397               | 0,288               | 0,724             | 0,432              | 0,101                |                           | 0,401             | 0,480       | 0,284             | 0,468              | 0,597                | Sig. (2-tailed)     |
| N                   | 10                  | 10                  | 10                | 10                 | 10                   |                           | 10                | 10          | 10                | 10                 | 10                   | N                   |

B)

| Female              |                     |                    |                   |                    |                      | Male                            |                  |             |                   |                    |                      |
|---------------------|---------------------|--------------------|-------------------|--------------------|----------------------|---------------------------------|------------------|-------------|-------------------|--------------------|----------------------|
|                     | Cartilage damage    | Dislocation        | Osteophyte number | Synovial thickness | Synovial cellularity | Early phase                     | Cartilage damage | Dislocation | Osteophyte number | Synovial thickness | Synovial cellularity |
| Pearson Correlation | ,716 <sup>+</sup>   | ,635 <sup>+</sup>  | 0,402             | -0,118             | 0,533                | Incapacitance Early             | 0,383            | 0,376       | 0,488             | 0,068              | 0,513                |
| Sig. (2-tailed)     | 0,020               | 0,048              | 0,249             | 0,745              | 0,113                |                                 | 0,274            | 0,285       | 0,153             | 0,853              | 0,129                |
| N                   | 10                  | 10                 | 10                | 10                 | 10                   |                                 | 10               | 10          | 10                | 10                 | 10                   |
| Pearson Correlation | 0,616               | ,850 <sup>++</sup> | 0,579             | 0,510              | 0,301                | PAM Early                       | 0,128            | -0,006      | 0,063             | -0,132             | 0,031                |
| Sig. (2-tailed)     | 0,058               | 0,002              | 0,079             | 0,132              | 0,398                |                                 | 0,724            | 0,987       | 0,862             | 0,716              | 0,932                |
| N                   | 10                  | 10                 | 10                | 10                 | 10                   |                                 | 10               | 10          | 10                | 10                 | 10                   |
| Pearson Correlation | ,700 <sup>+</sup>   | 0,149              | 0,420             | 0,456              | -0,035               | Max Contact Max Intensity Early | 0,630            | 0,594       | 0,528             | 0,602              | 0,540                |
| Sig. (2-tailed)     | 0,024               | 0,681              | 0,227             | 0,186              | 0,925                |                                 | 0,051            | 0,070       | 0,116             | 0,066              | 0,107                |
| N                   | 10                  | 10                 | 10                | 10                 | 10                   |                                 | 10               | 10          | 10                | 10                 | 10                   |
| Pearson Correlation | ,672 <sup>+</sup>   | ,777 <sup>++</sup> | 0,573             | 0,370              | 0,472                | Print Area Early                | 0,479            | 0,581       | 0,618             | 0,626              | 0,422                |
| Sig. (2-tailed)     | 0,033               | 0,008              | 0,084             | 0,292              | 0,168                |                                 | 0,162            | 0,078       | 0,057             | 0,053              | 0,224                |
| N                   | 10                  | 10                 | 10                | 10                 | 10                   |                                 | 10               | 10          | 10                | 10                 | 10                   |
| Pearson Correlation | ,882 <sup>+++</sup> | 0,602              | ,677 <sup>+</sup> | 0,572              | 0,396                | Duty Cycle Early                | 0,462            | 0,566       | 0,386             | 0,567              | 0,619                |
| Sig. (2-tailed)     | 0,001               | 0,066              | 0,031             | 0,084              | 0,257                |                                 | 0,179            | 0,088       | 0,270             | 0,088              | 0,057                |
| N                   | 10                  | 10                 | 10                | 10                 | 10                   |                                 | 10               | 10          | 10                | 10                 | 10                   |
| Pearson Correlation | ,756 <sup>+</sup>   | 0,393              | ,652 <sup>+</sup> | 0,550              | 0,442                | Stand time Early                | 0,098            | 0,078       | -0,019            | 0,013              | 0,229                |
| Sig. (2-tailed)     | 0,011               | 0,262              | 0,041             | 0,100              | 0,201                |                                 | 0,789            | 0,831       | 0,959             | 0,972              | 0,524                |
| N                   | 10                  | 10                 | 10                | 10                 | 10                   |                                 | 10               | 10          | 10                | 10                 | 10                   |
| Pearson Correlation | ,828 <sup>++</sup>  | ,792 <sup>++</sup> | 0,627             | 0,507              | 0,514                | Swing time Early                | 0,559            | 0,548       | 0,495             | ,688*              | 0,589                |
| Sig. (2-tailed)     | 0,003               | 0,006              | 0,052             | 0,135              | 0,128                |                                 | 0,093            | 0,101       | 0,145             | 0,028              | 0,073                |
| N                   | 10                  | 10                 | 10                | 10                 | 10                   |                                 | 10               | 10          | 10                | 10                 | 10                   |
| Pearson Correlation | 0,130               | 0,088              | 0,448             | 0,265              | 0,299                | Single Stance Early             | 0,155            | 0,181       | 0,612             | ,735*              | 0,343                |
| Sig. (2-tailed)     | 0,721               | 0,808              | 0,194             | 0,459              | 0,401                |                                 | 0,669            | 0,616       | 0,060             | 0,015              | 0,332                |
| N                   | 10                  | 10                 | 10                | 10                 | 10                   |                                 | 10               | 10          | 10                | 10                 | 10                   |
| Pearson Correlation | ,720 <sup>+</sup>   | ,798 <sup>++</sup> | 0,604             | ,717*              | 0,363                | Initial Dual Stance Early       | 0,416            | 0,353       | 0,254             | 0,435              | 0,514                |
| Sig. (2-tailed)     | 0,019               | 0,006              | 0,064             | 0,020              | 0,302                |                                 | 0,232            | 0,318       | 0,480             | 0,209              | 0,128                |
| N                   | 10                  | 10                 | 10                | 10                 | 10                   |                                 | 10               | 10          | 10                | 10                 | 10                   |
| Pearson Correlation | -0,132              | -0,252             | 0,123             | 0,068              | -0,143               | Terminal Dual Stance Early      | 0,245            | 0,279       | 0,614             | 0,568              | 0,209                |
| Sig. (2-tailed)     | 0,717               | 0,482              | 0,736             | 0,851              | 0,693                |                                 | 0,495            | 0,435       | 0,059             | 0,087              | 0,563                |
| N                   | 10                  | 10                 | 10                | 10                 | 10                   |                                 | 10               | 10          | 10                | 10                 | 10                   |

c)

| Female              |                  |                |                   |                    |                      | Male                           |                  |             |                   |                    |                      |                     |
|---------------------|------------------|----------------|-------------------|--------------------|----------------------|--------------------------------|------------------|-------------|-------------------|--------------------|----------------------|---------------------|
|                     | Cartilage damage | Dislocation    | Osteophyte number | Synovial thickness | Synovial cellularity | Late phase                     | Cartilage damage | Dislocation | Osteophyte number | Synovial thickness | Synovial cellularity |                     |
| Pearson Correlation | .952**           | 0.600          | 0.109             | 0.393              | 0.175                | Incapacitance Late             | 0.013            | -0.271      | 0.007             | .769**             | 0.014                | Pearson Correlation |
| Sig. (2-tailed)     | 0.000            | 0.067          | 0.764             | 0.262              | 0.628                |                                | 0.971            | 0.449       | 0.984             | 0.009              | 0.970                | Sig. (2-tailed)     |
| N                   | 10               | 10             | 10                | 10                 | 10                   |                                | 10               | 10          | 10                | 10                 | 10                   | N                   |
| Pearson Correlation | .731*            | .635*          | 0.234             | 0.378              | -0.039               | PAM Late                       | -0.118           | -0.415      | 0.203             | 0.017              | 0.234                | Pearson Correlation |
| Sig. (2-tailed)     | 0.016            | 0.049          | 0.514             | 0.281              | 0.915                |                                | 0.745            | 0.233       | 0.574             | 0.963              | 0.515                | Sig. (2-tailed)     |
| N                   | 10               | 10             | 10                | 10                 | 10                   |                                | 10               | 10          | 10                | 10                 | 10                   | N                   |
| Pearson Correlation | 0.443            | -0.039         | 0.182             | 0.250              | -0.247               | Max Contact Max Intensity Late | 0.195            | 0.033       | 0.156             | -0.246             | 0.018                | Pearson Correlation |
| Sig. (2-tailed)     | 0.200            | 0.915          | 0.614             | 0.486              | 0.491                |                                | 0.589            | 0.928       | 0.668             | 0.493              | 0.961                | Sig. (2-tailed)     |
| N                   | 10               | 10             | 10                | 10                 | 10                   |                                | 10               | 10          | 10                | 10                 | 10                   | N                   |
| Pearson Correlation | . <sup>d</sup>   | . <sup>d</sup> | . <sup>d</sup>    | . <sup>d</sup>     | . <sup>d</sup>       | Print Area Late                | -0.313           | -0.475      | -0.267            | -0.364             | -0.358               | Pearson Correlation |
| Sig. (2-tailed)     |                  |                |                   |                    |                      |                                | 0.379            | 0.166       | 0.456             | 0.301              | 0.310                | Sig. (2-tailed)     |
| N                   | 10               | 10             | 10                | 10                 | 10                   |                                | 10               | 10          | 10                | 10                 | 10                   | N                   |
| Pearson Correlation | .829***          | 0.368          | 0.598             | 0.505              | 0.314                | Duty Cycle Late                | -0.039           | 0.019       | -0.055            | -0.012             | 0.145                | Pearson Correlation |
| Sig. (2-tailed)     | 0.003            | 0.295          | 0.068             | 0.136              | 0.377                |                                | 0.915            | 0.959       | 0.879             | 0.973              | 0.689                | Sig. (2-tailed)     |
| N                   | 10               | 10             | 10                | 10                 | 10                   |                                | 10               | 10          | 10                | 10                 | 10                   | N                   |
| Pearson Correlation | .759*            | 0.376          | .647*             | 0.5212             | 0.348                | Stand time Late                | -0.106           | -0.145      | -0.127            | -0.106             | -0.023               | Pearson Correlation |
| Sig. (2-tailed)     | 0.011            | 0.285          | 0.043             | 0.122              | 0.324                |                                | 0.771            | 0.690       | 0.726             | 0.771              | 0.951                | Sig. (2-tailed)     |
| N                   | 10               | 10             | 10                | 10                 | 10                   |                                | 10               | 10          | 10                | 10                 | 10                   | N                   |
| Pearson Correlation | 0.312            | 0.340          | 0.485             | 0.346              | 0.259                | Swing time Late                | -0.534           | -0.569      | -.680*            | -0.540             | -.692*               | Pearson Correlation |
| Sig. (2-tailed)     | 0.380            | 0.336          | 0.156             | 0.328              | 0.469                |                                | 0.112            | 0.086       | 0.030             | 0.107              | 0.027                | Sig. (2-tailed)     |
| N                   | 10               | 10             | 10                | 10                 | 10                   |                                | 10               | 10          | 10                | 10                 | 10                   | N                   |
| Pearson Correlation | 0.176            | -0.393         | 0.084             | 0.011              | 0.193                | Single Stance Late             | -0.341           | -0.537      | 0.069             | 0.024              | -0.097               | Pearson Correlation |
| Sig. (2-tailed)     | 0.627            | 0.261          | 0.819             | 0.976              | 0.594                |                                | 0.334            | 0.109       | 0.851             | 0.948              | 0.790                | Sig. (2-tailed)     |
| N                   | 10               | 10             | 10                | 10                 | 10                   |                                | 10               | 10          | 10                | 10                 | 10                   | N                   |
| Pearson Correlation | .841***          | .929***        | .654*             | .697*              | 0.382                | Initial Dual Stance Late       | 0.393            | 0.357       | 0.239             | 0.419              | 0.497                | Pearson Correlation |
| Sig. (2-tailed)     | 0.002            | 0.000          | 0.040             | 0.025              | 0.276                |                                | 0.262            | 0.312       | 0.506             | 0.229              | 0.144                | Sig. (2-tailed)     |
| N                   | 10               | 10             | 10                | 10                 | 10                   |                                | 10               | 10          | 10                | 10                 | 10                   | N                   |
| Pearson Correlation | -0.313           | -0.256         | -0.401            | -0.578             | -.695*               | Terminal Dual Stance Late      | 0.019            | -0.052      | -0.254            | -0.271             | -0.125               | Pearson Correlation |
| Sig. (2-tailed)     | 0.378            | 0.476          | 0.250             | 0.080              | 0.026                |                                | 0.959            | 0.888       | 0.478             | 0.448              | 0.730                | Sig. (2-tailed)     |
| N                   | 10               | 10             | 10                | 10                 | 10                   |                                | 10               | 10          | 10                | 10                 | 10                   | N                   |
