# Supplementary material for: Early pain in females is linked to late pathological features in murine experimental osteoarthritis
Source: PeerJ journal article supplement (doi:10.7717/peerj.15482), 2023-06-22
Supplement: TableS2.pdf [file TableS2.pdf]

A)

|                     | Female           |             |                                  | Male             |             |                     |
|---------------------|------------------|-------------|----------------------------------|------------------|-------------|---------------------|
|                     | Cartilage damage | Dislocation | Total Time course                | Cartilage damage | Dislocation |                     |
| Pearson Correlation | -0,005           | 0,096       | <b>Max Contact Max Intensity</b> | 0,315            | 0,363       | Pearson Correlation |
| Sig. (2-tailed)     | 0,980            | 0,616       |                                  | 0,176            | 0,116       | Sig. (2-tailed)     |
| N                   | 30               | 30          |                                  | 20               | 20          | N                   |
| Pearson Correlation | 0,124            | 0,219       | <b>Print Area</b>                | 0,340            | 0,245       | Pearson Correlation |
| Sig. (2-tailed)     | 0,514            | 0,244       |                                  | 0,142            | 0,297       | Sig. (2-tailed)     |
| N                   | 30               | 30          |                                  | 20               | 20          | N                   |
| Pearson Correlation | ,376*            | ,436*       | <b>Duty Cycle</b>                | 0,023674901      | 0,136       | Pearson Correlation |
| Sig. (2-tailed)     | 0,041            | 0,016       |                                  | 0,921            | 0,567       | Sig. (2-tailed)     |
| N                   | 30               | 30          |                                  | 20               | 20          | N                   |
| Pearson Correlation | ,551**           | ,559**      | <b>Single Stance</b>             | 0,054            | 0,105       | Pearson Correlation |
| Sig. (2-tailed)     | 0,002            | 0,001       |                                  | 0,820            | 0,658       | Sig. (2-tailed)     |
| N                   | 30               | 30          |                                  | 20               | 20          | N                   |
| Pearson Correlation | 0,039            | 0,186       | <b>Initial Dual Stance</b>       | 0,261            | 0,275       | Pearson Correlation |
| Sig. (2-tailed)     | 0,838            | 0,324       |                                  | 0,266            | 0,241       | Sig. (2-tailed)     |
| N                   | 30               | 30          |                                  | 20               | 20          | N                   |
| Pearson Correlation | 0,102            | -0,138      | <b>Terminal Dual Stance</b>      | 0,014            | 0,068       | Pearson Correlation |
| Sig. (2-tailed)     | 0,590            | 0,466       |                                  | 0,952            | 0,777       | Sig. (2-tailed)     |
| N                   | 30               | 30          |                                  | 20               | 20          | N                   |

B)

|                     | Female           |             |                                        | Male             |             |                     |
|---------------------|------------------|-------------|----------------------------------------|------------------|-------------|---------------------|
|                     | Cartilage damage | Dislocation | Early phase                            | Cartilage damage | Dislocation |                     |
| Pearson Correlation | 0,159            | 0,231       | <b>Max Contact Max Intensity Early</b> | 0,287            | 0,376       | Pearson Correlation |
| Sig. (2-tailed)     | 0,401            | 0,219       |                                        | 0,219            | 0,103       | Sig. (2-tailed)     |
| N                   | 30               | 30          |                                        | 20               | 20          | N                   |
| Pearson Correlation | 0,294            | 0,356       | <b>Print Area Early</b>                | 0,313            | 0,343       | Pearson Correlation |
| Sig. (2-tailed)     | 0,115            | 0,053       |                                        | 0,180            | 0,139       | Sig. (2-tailed)     |
| N                   | 30               | 30          |                                        | 20               | 20          | N                   |
| Pearson Correlation | ,500**           | ,524**      | <b>Duty Cycle Early</b>                | 0,123            | 0,233       | Pearson Correlation |
| Sig. (2-tailed)     | 0,005            | 0,003       |                                        | 0,605            | 0,322       | Sig. (2-tailed)     |
| N                   | 30               | 30          |                                        | 20               | 20          | N                   |
| Pearson Correlation | ,610**           | ,561**      | <b>Single Stance Early</b>             | 0,115            | 0,233       | Pearson Correlation |
| Sig. (2-tailed)     | 0,000            | 0,001       |                                        | 0,630            | 0,324       | Sig. (2-tailed)     |
| N                   | 30               | 30          |                                        | 20               | 20          | N                   |
| Pearson Correlation | 0,005            | 0,086       | <b>Initial Dual Stance Early</b>       | 0,280            | 0,282       | Pearson Correlation |
| Sig. (2-tailed)     | 0,979            | 0,650       |                                        | 0,232            | 0,228       | Sig. (2-tailed)     |
| N                   | 30               | 30          |                                        | 20               | 20          | N                   |
| Pearson Correlation | 0,184            | -0,011      | <b>Terminal Dual Stance Early</b>      | 0,039            | 0,157       | Pearson Correlation |
| Sig. (2-tailed)     | 0,330            | 0,953       |                                        | 0,871            | 0,509       | Sig. (2-tailed)     |
| N                   | 30               | 30          |                                        | 20               | 20          | N                   |

c)

|                     | Female           |             | Late phase                            | Male             |             |                     |
|---------------------|------------------|-------------|---------------------------------------|------------------|-------------|---------------------|
|                     | Cartilage damage | Dislocation |                                       | Cartilage damage | Dislocation |                     |
| Pearson Correlation | -0,133           | 0,006       | <b>Max Contact Max Intensity Late</b> | 0,199            | 0,125       | Pearson Correlation |
| Sig. (2-tailed)     | 0,483            | 0,977       |                                       | 0,399            | 0,599       | Sig. (2-tailed)     |
| N                   | 30               | 30          |                                       | 20               | 20          | N                   |
| Pearson Correlation | -0,183           | -0,022      | <b>Print Area Late</b>                | 0,163            | -0,044      | Pearson Correlation |
| Sig. (2-tailed)     | 0,334            | 0,909       |                                       | 0,493            | 0,853       | Sig. (2-tailed)     |
| N                   | 30               | 30          |                                       | 20               | 20          | N                   |
| Pearson Correlation | 0,022            | 0,111       | <b>Duty Cycle Late</b>                | -0,080           | 0,027       | Pearson Correlation |
| Sig. (2-tailed)     | 0,909            | 0,559       |                                       | 0,737            | 0,912       | Sig. (2-tailed)     |
| N                   | 30               | 30          |                                       | 20               | 20          | N                   |
| Pearson Correlation | 0,032            | 0,136       | <b>Single Stance Late</b>             | 0,037            | -0,005      | Pearson Correlation |
| Sig. (2-tailed)     | 0,866            | 0,473       |                                       | 0,876            | 0,985       | Sig. (2-tailed)     |
| N                   | 30               | 30          |                                       | 20               | 20          | N                   |
| Pearson Correlation | 0,019            | 0,193       | <b>Initial Dual Stance Late</b>       | 0,245            | 0,251       | Pearson Correlation |
| Sig. (2-tailed)     | 0,921            | 0,306       |                                       | 0,299            | 0,286       | Sig. (2-tailed)     |
| N                   | 30               | 30          |                                       | 20               | 20          | N                   |
| Pearson Correlation | -0,105           | -0,263      | <b>Terminal Dual Stance Late</b>      | -0,105           | -0,137      | Pearson Correlation |
| Sig. (2-tailed)     | 0,580            | 0,160       |                                       | 0,660            | 0,565       | Sig. (2-tailed)     |
| N                   | 30               | 30          |                                       | 20               | 20          | N                   |
